# Supplementary material for: The Influence of Filler Particles on the Mechanical Properties of Maxillofacial Prosthetic Silicone Elastomers: A Systematic Review and Meta-Analysis
Source: Polymers (Basel). 2020 Jul 12;12(7):1536. doi: 10.3390/polym12071536 (PMC7408417; doi:10.3390/polym12071536)
Supplement: Supplementary file 1 [file polymers-12-01536-s001.pdf]

**Table S1.** Subgroup analysis and forest plot of hardness (Shore A) studies.

| Author (year)  | Year | Type of Silicone | Filler with %                                                                                  | Tensile Strength (MPa)                                                    | Tear Strength (N/mm)                             | Hardness (Shore A)                        | Elongation at Break (%)                          | Author remarks                                                                                                                                                                                                   |
|----------------|------|------------------|------------------------------------------------------------------------------------------------|---------------------------------------------------------------------------|--------------------------------------------------|-------------------------------------------|--------------------------------------------------|------------------------------------------------------------------------------------------------------------------------------------------------------------------------------------------------------------------|
| Mohammad et al | 2019 | VST-50F          | Y <sub>2</sub> O <sub>3</sub> (1%-1.5%)                                                        | more in 1.5% filler<br>5.650 MPa<br>(P > 0.05)                            | More in 1.5% filler<br>27.98 N/mm<br>(P<0.05)    | More in 1.5% filler<br>32.31<br>(P<0.05)  | Increased by 574 for 1.5% concentration (P>0.05) | 1. Adding Y <sub>2</sub> O <sub>3</sub> significantly increase tear and hardness but non-significantly increase in tensile strength.                                                                             |
| Salih et al    | 2019 | VST-50F          | Pomegranate Peels Powder (PPP), powder of dates Ajwa (SPDA) (0.0, 0.1%, 0.2%, 0.3%, 0.4%)      | More in 0.2% PPP 7.888 MPa, 0.3% SPDA 7.3 MPa                             | More in 0.2% PPP 31.1N/mm, 0.3% SPDA 30.6 N/mm   | More in 0.4% PPP 30.5, 0.3% SPDA 30.00    | Not seen                                         | 1. Author did not use net silicone, they added PMMA with silicone.<br>2. P value was not mentioned.                                                                                                              |
| Salih et al    | 2019 | VST-50F          | Pomegranate Peels Powder (PPP), woven fibers (UHMWPE) (0.0%, 0.5% , 1% UHMWPE fiber, 0.2% PPP) | More in 0.5% UHMWPE chopped fibers - 8.05 MPa continuous fibers- 10.4 MPa | More in 0.5% UHMWPE continuous fibers 48.00 N/mm | More in 1% UHMWPE continuous fibers 37.00 | Not seen                                         | 1. Chopped and continuous UHMWPE was used.<br>2. In certain concentrations property increase then decrease.<br>3. Author did not use net silicone. He added PMMA with silicone.<br>4. P value was not mentioned. |
| Haider et al   | 2019 | A-2186           | Polyester powder (1%,3%,5%)                                                                    | More in 1% filler 5.010 MPa                                               | More in 1% filler 23.48 N/mm                     | More in 5% filler 34.6750                 | Not seen                                         | 1. Polyester showed no significant effect on the hardness of the                                                                                                                                                 |

|               |      |                       |                                                    |                                                |                                                  |                                                       |                                                    |  |          |                                                                                                                                              |
|---------------|------|-----------------------|----------------------------------------------------|------------------------------------------------|--------------------------------------------------|-------------------------------------------------------|----------------------------------------------------|--|----------|----------------------------------------------------------------------------------------------------------------------------------------------|
|               |      |                       |                                                    | (P=0.001)                                      | (P=0.002)                                        | (P<0.01)                                              |                                                    |  |          | silicone, but it was still within the acceptable clinical limit                                                                              |
| Alsmael et al | 2018 | Silicone VST-50       | Titanium Silicate (TiSiO <sub>4</sub> ) (0.5% -1%) | More in 0.5% filler<br>8.01 MPa<br>(P =0.426)  | More in 0.5% filler<br>27.92 N/mm<br>(P=0.362)   | More in 1% 38.89<br>(P=0.259)                         | Not seen                                           |  | 1.       | Most optimum enhancement of silicone was observed on 0.5% filler.                                                                            |
| Pınar Çevik   | 2018 | A -2000, A -2006      | Silane treated silica and TiO <sub>2</sub> (10%)   | Not seen                                       | Not seen                                         | More in A-2000 in silane filler<br>48.86<br>(P<0.001) | Not seen                                           |  | 1.       | A-2000 silicone showed maximum hardness values in all study groups.                                                                          |
| Azeez et al   | 2018 | VST-50                | Ag-Zn zeolite powder (0.5% - 1.5%)                 | More with 1% filler<br>4.08 MPa<br>(P<0.01)    | More in 1% filler<br>22.57 N/mm<br>(P<0.01)      | More in 1.5% filler<br>34.89<br>(P<0.01)              | More in control group<br>342.5%<br>(P<0.01)        |  | 1.       | 1% filler shows change in tear and tensile strength but not change in hardness.                                                              |
| Shakir et al  | 2018 | VST50F, Cosmesil M511 | nano-TiO <sub>2</sub> (0.25%- 0.2%)                | More in RTV silicone<br>6.450 MPa<br>(P< 0.01) | More in RTV silicone<br>27.670 N/mm<br>(P< 0.01) | More in RTV silicone<br>29.270<br>(P< 0.01)           | Increased by 1462.707 for RTV silicone<br>(P<0.01) |  | 1.       | TiO <sub>2</sub> improves tear and tensile strength but increases the hardness is directly proportion to the concentration of the nanofiller |
| Salih et al   | 2018 | Silicone rubber       | PMMA (5%,10%,15%,20 %)                             | More in 10% filler                             | Not seen                                         | More in 10%                                           | More in control group                              |  | 1.<br>2. | Undefined particle size of PMMA acrylic powder.<br>P value was not mentioned.                                                                |

|                                             |      |                          |                                                                               |                                                                              |                            |                                                                                 |                                                                          |                                                      |                                                                                                                                                                                                                                                                |
|---------------------------------------------|------|--------------------------|-------------------------------------------------------------------------------|------------------------------------------------------------------------------|----------------------------|---------------------------------------------------------------------------------|--------------------------------------------------------------------------|------------------------------------------------------|----------------------------------------------------------------------------------------------------------------------------------------------------------------------------------------------------------------------------------------------------------------|
| Al-Hakam J Ibrahim* , Hikmat Jameel Al-Judy | 2018 | VST-50F                  | Chitosan powder (1.5%,2.5%,3.5%)                                              | Significant decrease                                                         |                            | More in 3.5% filler                                                             | Not seen                                                                 | Not seen                                             | <ol style="list-style-type: none"> <li>1. Antimicrobial effect is also seen in this paper.</li> <li>2. P value was not mentioned.</li> </ol>                                                                                                                   |
| Jebur et al                                 | 2018 | A-2186                   | Polyester fibre(0.25%,0.5% )                                                  | More in 0.25% filler<br>6.8120 MPa                                           | 0.25%                      | More in 0.25% filler<br>25.968 N/mm                                             | More in 0.5% filler<br>45.497                                            | Increased by 220.551 for 0.5% filler concentrate     | <ol style="list-style-type: none"> <li>1. Adding polyester increase tensile and tear strength in certain concentration then decreased but hardness increased proportionally with increased polyester fibers.</li> <li>2. P value was not mentioned.</li> </ol> |
| Kareem et al                                | 2018 | RTV (Name not mentioned) | Zirconium silicate (ZrSiO <sub>4</sub> ) (0.5-1.5%)                           | More in 1.5% filler<br>6.725 MPa (P<0.01)                                    | 1.5%                       | More in 1.5% filler<br>23.40 N/mm (P<0.01)                                      | More in 1.5% filler<br>34.86 (P<0.01)                                    | Increased by 1424.40 for 1.5% concentration (P<0.01) | <ol style="list-style-type: none"> <li>1. Increases all the properties but highest increase in hardness.</li> </ol>                                                                                                                                            |
| Pinar Cevik, Oguz Eraslan,                  | 2017 | A -2000, A -2006         | TiO <sub>2</sub> , Silaned silica hydrophobic, Fumed silica hydrophilic (10%) | More in A -2000 silicone with Fumed hydrophilic filler<br>5.33 MPa (P=0.002) | A -2000 with silica filler | More in A -2000 silicone with Fumed hydrophilic filler<br>17.93 N/mm (P= 0.187) | More in A-2000 silicone with Fumed hydrophilic filler<br>36.64 (P=0,028) | More in control group<br>485.33 (P=0.029)            | <ol style="list-style-type: none"> <li>1. A-2000 silicone elastomer revealed maximum mechanical strengths in all study groups.</li> </ol>                                                                                                                      |
| Mustafa S. Tukmachi                         | 2017 | Cosmesil M-511           | SiO <sub>2</sub> (0%, 4%, 5%, 6%)                                             | More in 5% filler                                                            |                            | More in 5% filler                                                               | More in 6% filler                                                        | Increased by 728.8 for                               | <ol style="list-style-type: none"> <li>1. 5% Nano SiO<sub>2</sub> significantly improves all mechanical properties.</li> </ol>                                                                                                                                 |

|                                            |      |                                                              |                                                                          |                                                                          |                                                                          |                                                              |                                                    |              |                                                                                                                                                                                                                                                                |
|--------------------------------------------|------|--------------------------------------------------------------|--------------------------------------------------------------------------|--------------------------------------------------------------------------|--------------------------------------------------------------------------|--------------------------------------------------------------|----------------------------------------------------|--------------|----------------------------------------------------------------------------------------------------------------------------------------------------------------------------------------------------------------------------------------------------------------|
| ,<br>Mohamm<br>ed<br>Moudhaff<br>er M. Ali |      |                                                              |                                                                          | 36.63 MPa<br>(P<0.01)                                                    | 21.408 N/mm<br>(P<0.01)                                                  | 36.63<br>(P<0.01)                                            | 5%<br>concentration<br>(P<0.01)                    | 2.           | In one group color change is seen.                                                                                                                                                                                                                             |
| Alsamara<br>ay et al                       | 2017 | A-2186                                                       | Polyamide-6<br>(Nylon-6)<br>(1%,3%,5%)                                   | Non-significant<br>increase in 1%<br>filler<br><br>5.505 MPa<br>(P=0.49) | Non-significant<br>increase in 1% filler<br><br>20.122 N/mm<br>(P=1.452) | Increased in 1%<br>filler<br><br>44.52<br>(P<0.01)           | More in<br>control group<br><br>270.69<br>(P<0.01) | 1.<br><br>2. | PA-6 micro fillers prevent rapid<br>degradation of mechanical<br>properties of silicone under aging<br>condition.<br><br>Variation in the mechanical<br>properties of silicone value is<br>directly proportional to the dose<br>and duration of the radiation. |
| Kalamarz<br>et al                          | 2016 | polydime<br>thylsiloxa<br>ne,<br>Methylhy<br>drosiloxa<br>ne | hydrophobic<br>fumed silica,<br>silanamine (10%,<br>15%)                 | More with 15%<br>hydrophobic<br>fumed silica<br><br>(P<0.01)             | Not seen                                                                 | More with 15%<br>hydrophobic fumed<br>silica<br><br>(P<0.01) | Not seen                                           | 1.<br><br>2. | Change in properties was seen after<br>24 hours, after 7 days and after 28<br>days.<br><br>Particular value not mentioned only<br>bar chart given                                                                                                              |
| Nobrega<br>et al                           | 2016 | MDX4-<br>4210                                                | ZnO, barium<br>sulphate (BaSO <sub>4</sub> ),<br>TiO <sub>2</sub> (1-2%) | Not seen                                                                 | More in 1% barium<br>sulphate<br><br>3.11 N/mm<br>(P=0.01)               | More in 2% ZnO<br><br>29.33<br>(P<0.001)                     | Not seen                                           | 1.<br><br>2. | Oil paint was used in one group.<br><br>Only hardness was seen with and<br>without incorporated oil paint.                                                                                                                                                     |
| Liu et al                                  | 2015 | MDX4-<br>4210                                                | Expancel , SiO <sub>2</sub><br>(5%,10%,15% by<br>volume)                 | More in 10% SiO <sub>2</sub>                                             | More in control<br>group                                                 | More in SiO <sub>2</sub> 15%                                 | Not seen                                           | 1.<br><br>2. | SiO <sub>2</sub> is better than expancel.<br><br>specific value was not mentioned.                                                                                                                                                                             |

|             |      |           |                                                     |                                                                                  |                                                      |                                                 |                                                   |                                                                                                                                                                                                     |
|-------------|------|-----------|-----------------------------------------------------|----------------------------------------------------------------------------------|------------------------------------------------------|-------------------------------------------------|---------------------------------------------------|-----------------------------------------------------------------------------------------------------------------------------------------------------------------------------------------------------|
| Wang et al  | 2014 | MDX4-4210 | TiO <sub>2</sub> (2%,4%,6%)                         | More in 6% filler<br>3.29 MPa<br>(P < 0.05)                                      | More in 2% filler<br>2.58 N/mm<br>(P < 0.05)         | More in 6% filler<br>31.97<br>(P < 0.05)        | Increased by 254.28 for 2% concentration (P<0.05) | 1. Author also seen UV aging<br>2. Inadequate description of sample.                                                                                                                                |
| Zayed et al | 2014 | A-2186    | SiO <sub>2</sub> (0.5%, 1%,1.5%,2%,2.5%,3%)         | More in 3% filler<br>3.62 MPa<br>(P<0.001)                                       | More in 3% filler<br>45.90 N/mm<br>(P<0.001)         | More in 3% filler<br>29.97                      | Increased by 754.8 for 1.5% concentration         | 1. The correct filler concentration improves mechanical properties.<br>2. P value of hardness and elongation at break is not mentioned.                                                             |
| Liu et al   | 2013 | MDX4-4210 | Expancel (0%,5%,15%,30% by volume)                  | More in 5% filler<br>(P<0.05)                                                    | Decrease<br>(P<0.05)                                 | Decrease<br>(P<0.05)                            | More in 5% filler<br>(P<0.05)                     | 1. Specific values were not mentioned, only graphical representation given.                                                                                                                         |
| Han et al   | 2008 | A-2186    | TiO <sub>2</sub> , ZnO, CeO <sub>2</sub> (0.5% -3%) | More in 2% ZnO<br>1.7 MPa,<br>More in 2% TiO <sub>2</sub><br>1.7 MPa<br>(P<0.05) | More in 2% TiO <sub>2</sub><br>2.4 N/mm<br>(P<0.001) | More in 3% CeO <sub>2</sub><br>3.9<br>(P<0.001) | Increased by 59 for 2% TiO <sub>2</sub> (P<0.001) | 1. Incorporating Nano-oxides with silicone elastomer to improve mechanical properties is concentration specific, not dependent on choice of Nano oxide: TiO <sub>2</sub> , ZnO, or CeO <sub>2</sub> |
| Gunay et al | 2008 | A-2186    | Tulle % not mentioned                               | Increased<br>(P<0.05)                                                            | Increased<br>(P<0.05)                                | Not seen                                        | More in control group 371 (P<0.05)                | 1. tulle increased resistance against tearing and rupture at the edges without causing any esthetic deformation                                                                                     |

|                    |      |                                     |                                                                         |                                              |                                    |                                       |                       |                                                                                                                                                                                                                                                               |
|--------------------|------|-------------------------------------|-------------------------------------------------------------------------|----------------------------------------------|------------------------------------|---------------------------------------|-----------------------|---------------------------------------------------------------------------------------------------------------------------------------------------------------------------------------------------------------------------------------------------------------|
| Aziz et al         | 2003 | Cosmesil (HC), Cosmesil (Standard ) | silica R104, R106, R202, R972, R974, R812s (0%, 5%, 10%, 15%, 20%, 25%) | More in silica filler 20% R812s with 30% DMS | More in silica filler R812s 20-25% | More in silica 20% R812s with 50% DMS | More in control group | 1. Author used various type of silica filler.<br>2. They used (0%, 5%, 10%, 15%, 20%, 25%) only for tear strength but only 20% R812s for tensile and hardness.                                                                                                |
|                    |      |                                     |                                                                         | 7.41 N/mm (P<0.001)                          | 68.15 (P<0.001)                    | 475.9 (P<0.001)                       |                       |                                                                                                                                                                                                                                                               |
| Andreopoulos et al | 1998 | A poly (dimethyl siloxane)          | Silica (up to 50%) by volume                                            | More in 35% silica                           | More in 50% silica                 | Not seen                              | More in 35% silica    | 1. Specific measurement of properties was not mentioned.<br>2. tensile strength increased up to 35% but tear strength increased with the increase of filler<br>3. Inadequate description of sample size.                                                      |
| Andreopoulos et al | 1994 | A poly (dimethyl siloxane) rubber   | Silica (30%,35%,40%,45%,50%,55%) by volume                              | More in 55% silica                           | More in 55% silica                 | More in 55% silica                    | More in 35% silica    | 1. Specific measurement of properties was not mentioned.<br>2. They also used aramid, UHMPE and glass as a reinforcement.<br>3. Silica loading up to 35% increases mechanical strength, which is then decreased.<br>4. Inadequate description of sample size. |
